# Supplementary material
Source: publisher figshare collection journal article supplement (https://tandf.figshare.com/ndownloader/files/27702610)
Supplement: Supplementary file 1 [file 27702610]

                            
model{


###############################################################
# Specify the distributions at time 1 for the latent variables
# Whole Numbers
# Partitioning Error
# Unitizing Error
# Avoiding Math

# Do this separately for each level
# Referring to the previous level as needed

###############################################################

for(i in 1:N){

  ############################################################################
  # Level 1
  ############################################################################
  whole.numbers.Level.1[i,1] ~ dbern(p.whole.numbers.Level.1)
  whole.numbers.plus1.Level.1[i,1] <- whole.numbers.Level.1[i,1] + 1

  partitioning.error.Level.1[i,1] ~ dbern(p.partitioning.error.Level.1)
  partitioning.error.plus1.Level.1[i,1] <- partitioning.error.Level.1[i,1] + 1

  unitizing.error.Level.1[i,1] ~ dbern(p.unitizing.error.Level.1)
  unitizing.error.plus1.Level.1[i,1] <- unitizing.error.Level.1[i,1] + 1

  avoiding.math.Level.1[i,1] ~ dbern(p.avoiding.math.Level.1)
  avoiding.math.plus1.Level.1[i,1] <- avoiding.math.Level.1[i,1] + 1

  ############################################################################
  # At the *end* of Level 1
  ############################################################################
  Level.1.last.attempt[i] <- max(n.attempts.for.person.for.level[i,1], 1)
  
  whole.numbers.after.Level.1[i] <- whole.numbers.Level.1[i,Level.1.last.attempt[i]]
  whole.numbers.plus1.after.Level.1[i] <- whole.numbers.after.Level.1[i] + 1
	
  partitioning.error.after.Level.1[i] <- partitioning.error.Level.1[i,Level.1.last.attempt[i]]
  partitioning.error.plus1.after.Level.1[i] <- partitioning.error.after.Level.1[i] + 1

  unitizing.error.after.Level.1[i] <- unitizing.error.Level.1[i,Level.1.last.attempt[i]]
  unitizing.error.plus1.after.Level.1[i] <- unitizing.error.after.Level.1[i] + 1

  avoiding.math.after.Level.1[i] <- avoiding.math.Level.1[i,Level.1.last.attempt[i]]
  avoiding.math.plus1.after.Level.1[i] <- avoiding.math.after.Level.1[i] + 1


  ############################################################################
  # Level 2
  ############################################################################
  whole.numbers.Level.2[i,1] <- whole.numbers.after.Level.1[i]
  whole.numbers.plus1.Level.2[i,1] <- whole.numbers.Level.2[i,1] + 1

  partitioning.error.Level.2[i,1] <- partitioning.error.after.Level.1[i]
  partitioning.error.plus1.Level.2[i,1] <- partitioning.error.Level.2[i,1] + 1

  unitizing.error.Level.2[i,1] <- unitizing.error.after.Level.1[i]
  unitizing.error.plus1.Level.2[i,1] <- unitizing.error.Level.2[i,1] + 1

  avoiding.math.Level.2[i,1] <- avoiding.math.after.Level.1[i]
  avoiding.math.plus1.Level.2[i,1] <- avoiding.math.Level.2[i,1] + 1

  ############################################################################
  # At the *end* of Level 2
  ############################################################################
  Level.2.last.attempt[i] <- max(n.attempts.for.person.for.level[i,2], 1)
  
  whole.numbers.after.Level.2[i] <- whole.numbers.Level.2[i,Level.2.last.attempt[i]]
  whole.numbers.plus1.after.Level.2[i] <- whole.numbers.after.Level.2[i] + 1
  
  partitioning.error.after.Level.2[i] <- partitioning.error.Level.2[i,Level.2.last.attempt[i]]
  partitioning.error.plus1.after.Level.2[i] <- partitioning.error.after.Level.2[i] + 1

  unitizing.error.after.Level.2[i] <- unitizing.error.Level.2[i,Level.2.last.attempt[i]]
  unitizing.error.plus1.after.Level.2[i] <- unitizing.error.after.Level.2[i] + 1

  avoiding.math.after.Level.2[i] <- avoiding.math.Level.2[i,1]
  avoiding.math.plus1.after.Level.2[i] <- avoiding.math.after.Level.2[i] + 1


  
  ############################################################################
  # Level 3
  ############################################################################
  whole.numbers.Level.3[i,1] <- whole.numbers.after.Level.2[i]
  whole.numbers.plus1.Level.3[i,1] <- whole.numbers.Level.3[i,1] + 1

  partitioning.error.Level.3[i,1] <- partitioning.error.after.Level.2[i]
  partitioning.error.plus1.Level.3[i,1] <- partitioning.error.Level.3[i,1] + 1

  unitizing.error.Level.3[i,1] <- unitizing.error.after.Level.2[i]
  unitizing.error.plus1.Level.3[i,1] <- unitizing.error.Level.3[i,1] + 1

  avoiding.math.Level.3[i,1] <- avoiding.math.after.Level.2[i]
  avoiding.math.plus1.Level.3[i,1] <- avoiding.math.Level.3[i,1] + 1


  ############################################################################
  # At the *end* of Level 3
  ############################################################################
  Level.3.last.attempt[i] <- max(n.attempts.for.person.for.level[i,3], 1)
  
  whole.numbers.after.Level.3[i] <- whole.numbers.Level.3[i,Level.3.last.attempt[i]]
  whole.numbers.plus1.after.Level.3[i] <- whole.numbers.after.Level.3[i] + 1
	
  partitioning.error.after.Level.3[i] <- partitioning.error.Level.3[i,Level.3.last.attempt[i]]
  partitioning.error.plus1.after.Level.3[i] <- partitioning.error.after.Level.3[i] + 1

  unitizing.error.after.Level.3[i] <- unitizing.error.Level.3[i,Level.3.last.attempt[i]]
  unitizing.error.plus1.after.Level.3[i] <- unitizing.error.after.Level.3[i] + 1

  avoiding.math.after.Level.3[i] <- avoiding.math.Level.3[i,Level.3.last.attempt[i]]
  avoiding.math.plus1.after.Level.3[i] <- avoiding.math.after.Level.3[i] + 1

} # closes loop over i


########################################################################
# Specify the distribution for latent variables on subsequent attempts
########################################################################


    for(j in 1:1){                            
  
      for(which.attempt in 2:n.attempts.for.person.for.level[4,1]){
            whole.numbers.Level.1[4,which.attempt] ~ dbern(pi.whole.numbers.Level.1[whole.numbers.plus1.Level.1[4, previous.attempt[j, which.attempt]],main.outcome.Level.1[4, previous.attempt[j, which.attempt]]])
            whole.numbers.plus1.Level.1[4,which.attempt] <- whole.numbers.Level.1[4,which.attempt] + 1
            partitioning.error.Level.1[4,which.attempt] ~ dbern(pi.partitioning.error.Level.1[partitioning.error.plus1.Level.1[4, previous.attempt[j, which.attempt]],main.outcome.Level.1[4, previous.attempt[j, which.attempt]]])
            partitioning.error.plus1.Level.1[4,which.attempt] <- partitioning.error.Level.1[4,which.attempt] + 1
            unitizing.error.Level.1[4,which.attempt] ~ dbern(pi.unitizing.error.Level.1[unitizing.error.plus1.Level.1[4, previous.attempt[j, which.attempt]],main.outcome.Level.1[4, previous.attempt[j, which.attempt]]])
            unitizing.error.plus1.Level.1[4,which.attempt] <- unitizing.error.Level.1[4,which.attempt] + 1
            avoiding.math.Level.1[4,which.attempt] ~ dbern(pi.avoiding.math.Level.1[avoiding.math.plus1.Level.1[4, previous.attempt[j, which.attempt]],main.outcome.Level.1[4, previous.attempt[j, which.attempt]]])
            avoiding.math.plus1.Level.1[4,which.attempt] <- avoiding.math.Level.1[4,which.attempt] + 1
      } # closes loop over which.attempt

      for(which.attempt in 2:n.attempts.for.person.for.level[5,1]){
            whole.numbers.Level.1[5,which.attempt] ~ dbern(pi.whole.numbers.Level.1[whole.numbers.plus1.Level.1[5, previous.attempt[j, which.attempt]],main.outcome.Level.1[5, previous.attempt[j, which.attempt]]])
            whole.numbers.plus1.Level.1[5,which.attempt] <- whole.numbers.Level.1[5,which.attempt] + 1
            partitioning.error.Level.1[5,which.attempt] ~ dbern(pi.partitioning.error.Level.1[partitioning.error.plus1.Level.1[5, previous.attempt[j, which.attempt]],main.outcome.Level.1[5, previous.attempt[j, which.attempt]]])
            partitioning.error.plus1.Level.1[5,which.attempt] <- partitioning.error.Level.1[5,which.attempt] + 1
            unitizing.error.Level.1[5,which.attempt] ~ dbern(pi.unitizing.error.Level.1[unitizing.error.plus1.Level.1[5, previous.attempt[j, which.attempt]],main.outcome.Level.1[5, previous.attempt[j, which.attempt]]])
            unitizing.error.plus1.Level.1[5,which.attempt] <- unitizing.error.Level.1[5,which.attempt] + 1
            avoiding.math.Level.1[5,which.attempt] ~ dbern(pi.avoiding.math.Level.1[avoiding.math.plus1.Level.1[5, previous.attempt[j, which.attempt]],main.outcome.Level.1[5, previous.attempt[j, which.attempt]]])
            avoiding.math.plus1.Level.1[5,which.attempt] <- avoiding.math.Level.1[5,which.attempt] + 1
      } # closes loop over which.attempt


[continues for all people with multiple attempts)

    } # closes loop over j                            
  

    for(j in 2:2){                            
  
      for(which.attempt in 2:n.attempts.for.person.for.level[1,2]){
            whole.numbers.Level.2[1,which.attempt] ~ dbern(pi.whole.numbers.Level.2[whole.numbers.plus1.Level.2[1, previous.attempt[j, which.attempt]],main.outcome.Level.2[1, previous.attempt[j, which.attempt]]])
            whole.numbers.plus1.Level.2[1,which.attempt] <- whole.numbers.Level.2[1,which.attempt] + 1
            partitioning.error.Level.2[1,which.attempt] ~ dbern(pi.partitioning.error.Level.2[partitioning.error.plus1.Level.2[1, previous.attempt[j, which.attempt]],main.outcome.Level.2[1, previous.attempt[j, which.attempt]]])
            partitioning.error.plus1.Level.2[1,which.attempt] <- partitioning.error.Level.2[1,which.attempt] + 1
            unitizing.error.Level.2[1,which.attempt] ~ dbern(pi.unitizing.error.Level.2[unitizing.error.plus1.Level.2[1, previous.attempt[j, which.attempt]],main.outcome.Level.2[1, previous.attempt[j, which.attempt]]])
            unitizing.error.plus1.Level.2[1,which.attempt] <- unitizing.error.Level.2[1,which.attempt] + 1
      } # closes loop over which.attempt

      for(which.attempt in 2:n.attempts.for.person.for.level[3,2]){
            whole.numbers.Level.2[3,which.attempt] ~ dbern(pi.whole.numbers.Level.2[whole.numbers.plus1.Level.2[3, previous.attempt[j, which.attempt]],main.outcome.Level.2[3, previous.attempt[j, which.attempt]]])
            whole.numbers.plus1.Level.2[3,which.attempt] <- whole.numbers.Level.2[3,which.attempt] + 1
            partitioning.error.Level.2[3,which.attempt] ~ dbern(pi.partitioning.error.Level.2[partitioning.error.plus1.Level.2[3, previous.attempt[j, which.attempt]],main.outcome.Level.2[3, previous.attempt[j, which.attempt]]])
            partitioning.error.plus1.Level.2[3,which.attempt] <- partitioning.error.Level.2[3,which.attempt] + 1
            unitizing.error.Level.2[3,which.attempt] ~ dbern(pi.unitizing.error.Level.2[unitizing.error.plus1.Level.2[3, previous.attempt[j, which.attempt]],main.outcome.Level.2[3, previous.attempt[j, which.attempt]]])
            unitizing.error.plus1.Level.2[3,which.attempt] <- unitizing.error.Level.2[3,which.attempt] + 1
      } # closes loop over which.attempt


[continues for all people with multiple attempts)


    } # closes loop over j                            
  

    for(j in 3:3){                            
  
      for(which.attempt in 2:n.attempts.for.person.for.level[4,3]){
            whole.numbers.Level.3[4,which.attempt] ~ dbern(pi.whole.numbers.Level.3[whole.numbers.plus1.Level.3[4, previous.attempt[j, which.attempt]],main.outcome.Level.3[4, previous.attempt[j, which.attempt]]])
            whole.numbers.plus1.Level.3[4,which.attempt] <- whole.numbers.Level.3[4,which.attempt] + 1
            partitioning.error.Level.3[4,which.attempt] ~ dbern(pi.partitioning.error.Level.3[partitioning.error.plus1.Level.3[4, previous.attempt[j, which.attempt]],main.outcome.Level.3[4, previous.attempt[j, which.attempt]]])
            partitioning.error.plus1.Level.3[4,which.attempt] <- partitioning.error.Level.3[4,which.attempt] + 1
            unitizing.error.Level.3[4,which.attempt] ~ dbern(pi.unitizing.error.Level.3[unitizing.error.plus1.Level.3[4, previous.attempt[j, which.attempt]],main.outcome.Level.3[4, previous.attempt[j, which.attempt]]])
            unitizing.error.plus1.Level.3[4,which.attempt] <- unitizing.error.Level.3[4,which.attempt] + 1
            avoiding.math.Level.3[4,which.attempt] ~ dbern(pi.avoiding.math.Level.3[unitizing.error.plus1.Level.3[4, previous.attempt[j, which.attempt]],main.outcome.Level.3[4, previous.attempt[j, which.attempt]]])
            avoiding.math.plus1.Level.3[4,which.attempt] <- avoiding.math.Level.3[4,which.attempt] + 1
      } # closes loop over which.attempt

      for(which.attempt in 2:n.attempts.for.person.for.level[5,3]){
            whole.numbers.Level.3[5,which.attempt] ~ dbern(pi.whole.numbers.Level.3[whole.numbers.plus1.Level.3[5, previous.attempt[j, which.attempt]],main.outcome.Level.3[5, previous.attempt[j, which.attempt]]])
            whole.numbers.plus1.Level.3[5,which.attempt] <- whole.numbers.Level.3[5,which.attempt] + 1
            partitioning.error.Level.3[5,which.attempt] ~ dbern(pi.partitioning.error.Level.3[partitioning.error.plus1.Level.3[5, previous.attempt[j, which.attempt]],main.outcome.Level.3[5, previous.attempt[j, which.attempt]]])
            partitioning.error.plus1.Level.3[5,which.attempt] <- partitioning.error.Level.3[5,which.attempt] + 1
            unitizing.error.Level.3[5,which.attempt] ~ dbern(pi.unitizing.error.Level.3[unitizing.error.plus1.Level.3[5, previous.attempt[j, which.attempt]],main.outcome.Level.3[5, previous.attempt[j, which.attempt]]])
            unitizing.error.plus1.Level.3[5,which.attempt] <- unitizing.error.Level.3[5,which.attempt] + 1
            avoiding.math.Level.3[5,which.attempt] ~ dbern(pi.avoiding.math.Level.3[unitizing.error.plus1.Level.3[5, previous.attempt[j, which.attempt]],main.outcome.Level.3[5, previous.attempt[j, which.attempt]]])
            avoiding.math.plus1.Level.3[5,which.attempt] <- avoiding.math.Level.3[5,which.attempt] + 1
      } # closes loop over which.attempt


[continues for all people with multiple attempts)


    } # closes loop over j                            
  


###############################################################
# Specify the distribution for results from attempts
###############################################################
for(i in 1:N){

    for(j in 1:1){
      for(which.attempt in 1:n.attempts.for.person.for.level[i,j]){
            main.outcome.Level.1[i, which.attempt] ~ dcat(pi[whole.numbers.plus1.Level.1[i,which.attempt], partitioning.error.plus1.Level.1[i,which.attempt], unitizing.error.plus1.Level.1[i,which.attempt], avoiding.math.plus1.Level.1[i,which.attempt], j, ])
      } # closes loop over which.attempt
    } # closes loop over j

    for(j in 2:2){
     for(which.attempt in 1:n.attempts.for.person.for.level[i,j]){
          main.outcome.Level.2[i, which.attempt] ~ dcat(pi[whole.numbers.plus1.Level.2[i,which.attempt], partitioning.error.plus1.Level.2[i,which.attempt], unitizing.error.plus1.Level.2[i,which.attempt], 1, j, ])
     } # closes loop over which.attempt
    } # closes loop over j

    for(j in 3:3){
      for(which.attempt in 1:n.attempts.for.person.for.level[i,j]){
            main.outcome.Level.3[i, which.attempt] ~ dcat(pi[whole.numbers.plus1.Level.3[i,which.attempt], partitioning.error.plus1.Level.3[i,which.attempt], unitizing.error.plus1.Level.3[i,which.attempt], avoiding.math.plus1.Level.3[i,which.attempt], j, ])
      } # closes loop over which.attempt
    } # closes loop over j


} # closes loop over i


###############################################################
# Specify the prior for the proportion in each class of the latent variables
# Initiated in Level 1
###############################################################
p.whole.numbers.Level.1 ~ dbeta(1,1)
p.partitioning.error.Level.1 ~ dbeta(1,1)
p.unitizing.error.Level.1 ~ dbeta(1,1)
p.avoiding.math.Level.1 ~ dbeta(1,1)


###########################################################################################
# Specify the hierarchical prior structure for the transition matrices for latent variables
# that applies across levels in this analysis
###########################################################################################

for(k in 1:K){

} # closes loop over k

for(k in 1:K){
  for(previous.level in 1:2){
    pi.whole.numbers.alpha.minus.1[previous.level,k] ~ dpois(1) 
    pi.whole.numbers.beta.minus.1[previous.level,k] ~ dpois(9)
    pi.whole.numbers.alpha[previous.level,k] <- pi.whole.numbers.alpha.minus.1[previous.level,k] + 1
    pi.whole.numbers.beta[previous.level,k] <- pi.whole.numbers.beta.minus.1[previous.level,k] + 1

    pi.partitioning.error.alpha.minus.1[previous.level,k] ~ dpois(1) 
    pi.partitioning.error.beta.minus.1[previous.level,k] ~ dpois(1)
    pi.partitioning.error.alpha[previous.level,k] <- pi.partitioning.error.alpha.minus.1[previous.level,k] + 1
    pi.partitioning.error.beta[previous.level,k] <- pi.partitioning.error.beta.minus.1[previous.level,k] + 1

    pi.unitizing.error.alpha.minus.1[previous.level,k] ~ dpois(1) 
    pi.unitizing.error.beta.minus.1[previous.level,k] ~ dpois(1)
    pi.unitizing.error.alpha[previous.level,k] <- pi.unitizing.error.alpha.minus.1[previous.level,k] + 1
    pi.unitizing.error.beta[previous.level,k] <- pi.unitizing.error.beta.minus.1[previous.level,k] + 1

    pi.avoiding.math.alpha.minus.1[previous.level,k] ~ dpois(1) 
    pi.avoiding.math.beta.minus.1[previous.level,k] ~ dpois(1)
    pi.avoiding.math.alpha[previous.level,k] <- pi.avoiding.math.alpha.minus.1[previous.level,k] + 1
    pi.avoiding.math.beta[previous.level,k] <- pi.avoiding.math.beta.minus.1[previous.level,k] + 1

  } # closes loop over previous level
} # closes loop over k


###########################################################################################
# Specify the prior for the transition matrices for latent variables
# For level 1
###########################################################################################


###########################################################################################
# Specify the prior for the mastery transition matrix for whole numbers
###########################################################################################

for(k in 1:K){
  pi.whole.numbers.Level.1[2,k] <- 1 
} # closes loop over k

pi.whole.numbers.Level.1[1,1] ~ dbeta(pi.whole.numbers.alpha[1,1],pi.whole.numbers.beta[1,1]) # Standard solution

pi.whole.numbers.Level.1[1,2] <- 0 # Fractional solution

pi.whole.numbers.Level.1[1,3] ~ dbeta(pi.whole.numbers.alpha[1,3],pi.whole.numbers.beta[1,3]) # Alternate solution

pi.whole.numbers.Level.1[1,4] <- 0

pi.whole.numbers.Level.1[1,5] <- 0 # Shortcut solution

pi.whole.numbers.Level.1[1,6] <- 0 # Reset solution

pi.whole.numbers.Level.1[1,7] <- 0 # Wrong Direction
pi.whole.numbers.Level.1[1,8] <- 0 # Skipped key
 
pi.whole.numbers.Level.1[1,9] <- 0 # Wrong Numerator

pi.whole.numbers.Level.1[1,10] <- 0         # Saw As Mixed Number

pi.whole.numbers.Level.1[1,11] <- 0

pi.whole.numbers.Level.1[1,12] <- 0

pi.whole.numbers.Level.1[1,13] ~ dbeta(pi.whole.numbers.alpha[1,13],pi.whole.numbers.beta[1,13])   # Saw As One Unit

pi.whole.numbers.Level.1[1,14] <- 0 # Saw As Wholes

pi.whole.numbers.Level.1[1,15] ~ dbeta(pi.whole.numbers.alpha[1,15],pi.whole.numbers.beta[1,15]) # Saw As One Unit and Counted Hash Marks

pi.whole.numbers.Level.1[1,16] <- 0

pi.whole.numbers.Level.1[1,17] ~ dbeta(pi.whole.numbers.alpha[1,17],pi.whole.numbers.beta[1,17]) # Everything In Order

pi.whole.numbers.Level.1[1,18] ~ dbeta(pi.whole.numbers.alpha[1,18],pi.whole.numbers.beta[1,18]) # Unknown Error


###########################################################################################
# Specify the prior for the transition matrix for Partitioning Error
# This is the probability of transitioning *to* (acquiring, keeping) a misconception
###########################################################################################

pi.partitioning.error.Level.1[2,1] ~ dbeta(pi.partitioning.error.alpha[2,1],pi.partitioning.error.beta[2,1]) # Standard solution

pi.partitioning.error.Level.1[2,2] <- 0 # Fractional solution

pi.partitioning.error.Level.1[2,3] ~ dbeta(pi.partitioning.error.alpha[2,3],pi.partitioning.error.beta[2,3]) # Alternate solution

pi.partitioning.error.Level.1[2,4] <- 0

pi.partitioning.error.Level.1[2,5] <- 0 # Shortcut solution

pi.partitioning.error.Level.1[2,6] <- 0 # Reset solution

pi.partitioning.error.Level.1[2,7] <- 0 # Wrong Direction
pi.partitioning.error.Level.1[2,8] <- 0 # Skipped key

pi.partitioning.error.Level.1[2,9] <- 0 # Wrong Numerator

pi.partitioning.error.Level.1[2,10] <- 0         # Saw As Mixed Number

pi.partitioning.error.Level.1[2,11] <- 0

pi.partitioning.error.Level.1[2,12] <- 0

pi.partitioning.error.Level.1[2,13] <- pi.partitioning.error.Level.1[2,18] # Saw As One Unit

pi.partitioning.error.Level.1[2,14] <- 0 # Saw As Wholes

pi.partitioning.error.Level.1[2,15] ~ dbeta(pi.partitioning.error.alpha[2,15],pi.partitioning.error.beta[2,15]) # Saw As One Unit and Counted Hash Marks

pi.partitioning.error.Level.1[2,16] <- 0

pi.partitioning.error.Level.1[2,17] <- pi.partitioning.error.Level.1[2,18] # Everything In Order

pi.partitioning.error.Level.1[2,18] ~ dbeta(pi.partitioning.error.alpha[2,18],pi.partitioning.error.beta[2,18]) # Unknown Error


pi.partitioning.error.Level.1[1,1] <- 0          # Standard solution
pi.partitioning.error.Level.1[1,2] <- 0          # Fractional solution
pi.partitioning.error.Level.1[1,3] <- 0          # Alternate solution
pi.partitioning.error.Level.1[1,4] <- 0          # Incomplete solution
pi.partitioning.error.Level.1[1,5] <- 0          # Shortcut solution

pi.partitioning.error.Level.1[1,6] <- 0          # Reset solution

pi.partitioning.error.Level.1[1,7] <- 0          # Wrong Direction
pi.partitioning.error.Level.1[1,8] <- 0          # Skipped key

pi.partitioning.error.Level.1[1,9] <- 0 # Wrong Numerator

pi.partitioning.error.Level.1[1,10] <- 0         # Saw As Mixed Number

pi.partitioning.error.Level.1[1,11] <- 0

pi.partitioning.error.Level.1[1,12] <- 0

pi.partitioning.error.Level.1[1,13] <- pi.partitioning.error.Level.1[1,18] # Saw As One Unit

pi.partitioning.error.Level.1[1,14] <- 0 # Saw As Wholes

pi.partitioning.error.Level.1[1,15] ~ dbeta(pi.partitioning.error.alpha[1,15],pi.partitioning.error.beta[1,15]) # Saw As One Unit and Counted Hash Marks

pi.partitioning.error.Level.1[1,16] <- 0

pi.partitioning.error.Level.1[1,17] <- pi.partitioning.error.Level.1[1,18] # Everything In Order

pi.partitioning.error.Level.1[1,18] ~ dbeta(pi.partitioning.error.alpha[1,18],pi.partitioning.error.beta[1,18]) # Unknown Error


###########################################################################################
# Specify the prior for the transition matrix for Unitizing Error
# This is the probability of transitioning *to* (acquiring, keeping) a misconception
###########################################################################################

pi.unitizing.error.Level.1[2,1] ~ dbeta(pi.unitizing.error.alpha[2,1],pi.unitizing.error.beta[2,1]) # Standard solution

pi.unitizing.error.Level.1[2,2] <- 0 # Fractional solution

pi.unitizing.error.Level.1[2,3] ~ dbeta(pi.unitizing.error.alpha[2,3],pi.unitizing.error.beta[2,3]) # Alternate solution

pi.unitizing.error.Level.1[2,4] <- 0

pi.unitizing.error.Level.1[2,5] <- 0 # Shortcut solution

pi.unitizing.error.Level.1[2,6] <- 0 # Reset solution

pi.unitizing.error.Level.1[2,7] <- 0 # Wrong Direction
pi.unitizing.error.Level.1[2,8] <- 0 # Skipped key

pi.unitizing.error.Level.1[2,9] <- 0 # Wrong Numerator

pi.unitizing.error.Level.1[2,10] <- 0         # Saw As Mixed Number

pi.unitizing.error.Level.1[2,11] <- 0

pi.unitizing.error.Level.1[2,12] <- 0

pi.unitizing.error.Level.1[2,13] ~ dbeta(pi.unitizing.error.alpha[2,13],pi.unitizing.error.beta[2,13]) # Saw As One Unit

pi.unitizing.error.Level.1[2,14] <- 0 # Saw As Wholes

pi.unitizing.error.Level.1[2,15] <- pi.unitizing.error.Level.1[2,13]

pi.unitizing.error.Level.1[2,16] <- 0

pi.unitizing.error.Level.1[2,17] <- pi.unitizing.error.Level.1[2,18] # Everything In Order

pi.unitizing.error.Level.1[2,18] ~ dbeta(pi.unitizing.error.alpha[2,18],pi.unitizing.error.beta[2,18]) # Unknown Error


pi.unitizing.error.Level.1[1,1] <- 0          # Standard solution
pi.unitizing.error.Level.1[1,2] <- 0          # Fractional solution
pi.unitizing.error.Level.1[1,3] <- 0          # Alternate solution
pi.unitizing.error.Level.1[1,4] <- 0          # Incomplete solution
pi.unitizing.error.Level.1[1,5] <- 0          # Shortcut solution

pi.unitizing.error.Level.1[1,6] <- 0          # Reset solution

pi.unitizing.error.Level.1[1,7] <- 0          # Wrong Direction
pi.unitizing.error.Level.1[1,8] <- 0          # Skipped key

pi.unitizing.error.Level.1[1,9] <- 0 # Wrong Numerator

pi.unitizing.error.Level.1[1,10] <- 0         # Saw As Mixed Number

pi.unitizing.error.Level.1[1,11] <- 0

pi.unitizing.error.Level.1[1,12] <- 0

pi.unitizing.error.Level.1[1,13] ~ dbeta(pi.unitizing.error.alpha[1,13],pi.unitizing.error.beta[1,13]) # Saw As One Unit

pi.unitizing.error.Level.1[1,14] <- 0 # Saw As Wholes

pi.unitizing.error.Level.1[1,15] <- pi.unitizing.error.Level.1[1,13]

pi.unitizing.error.Level.1[1,16] <- 0

pi.unitizing.error.Level.1[1,17] <- pi.unitizing.error.Level.1[1,18] # Everything In Order

pi.unitizing.error.Level.1[1,18] ~ dbeta(pi.unitizing.error.alpha[1,18],pi.unitizing.error.beta[1,18]) # Unknown Error


###########################################################################################
# Specify the prior for the transition matrix for Avoiding Math
# This is the probability of transitioning *to* (acquiring, keeping) a misconception
###########################################################################################

pi.avoiding.math.Level.1[2,1] ~ dbeta(pi.avoiding.math.alpha[2,1],pi.avoiding.math.beta[2,1]) # Standard solution

pi.avoiding.math.Level.1[2,2] <- 0 # Fractional solution

pi.avoiding.math.Level.1[2,3] ~ dbeta(pi.avoiding.math.alpha[2,3],pi.avoiding.math.beta[2,3]) # Alternate solution

pi.avoiding.math.Level.1[2,4] <- 0

pi.avoiding.math.Level.1[2,5] <- 0 # Shortcut solution

pi.avoiding.math.Level.1[2,6] <- 0 # Reset solution

pi.avoiding.math.Level.1[2,7] <- 0 # Wrong Direction
pi.avoiding.math.Level.1[2,8] <- 0 # Skipped key

pi.avoiding.math.Level.1[2,9] <- 0 # Wrong Numerator

pi.avoiding.math.Level.1[2,10] <- 0         # Saw As Mixed Number

pi.avoiding.math.Level.1[2,11] <- 0

pi.avoiding.math.Level.1[2,12] <- 0

pi.avoiding.math.Level.1[2,13] <- pi.avoiding.math.Level.1[2,18] # Saw As One Unit

pi.avoiding.math.Level.1[2,14] <- 0 # Saw As Wholes

pi.avoiding.math.Level.1[2,15] <- pi.avoiding.math.Level.1[2,18]

pi.avoiding.math.Level.1[2,16] <- 0

pi.avoiding.math.Level.1[2,17] ~ dbeta(pi.avoiding.math.alpha[2,17],pi.avoiding.math.beta[2,17])

pi.avoiding.math.Level.1[2,18] ~ dbeta(pi.avoiding.math.alpha[2,18],pi.avoiding.math.beta[2,18]) # Unknown Error


pi.avoiding.math.Level.1[1,1] <- 0          # Standard solution
pi.avoiding.math.Level.1[1,2] <- 0          # Fractional solution
pi.avoiding.math.Level.1[1,3] <- 0          # Alternate solution
pi.avoiding.math.Level.1[1,4] <- 0          # Incomplete solution
pi.avoiding.math.Level.1[1,5] <- 0          # Shortcut solution

pi.avoiding.math.Level.1[1,6] <- 0          # Reset solution

pi.avoiding.math.Level.1[1,7] <- 0          # Wrong Direction
pi.avoiding.math.Level.1[1,8] <- 0          # Skipped key


pi.avoiding.math.Level.1[1,9] <- 0 # Wrong Numerator

pi.avoiding.math.Level.1[1,10] <- 0         # Saw As Mixed Number

pi.avoiding.math.Level.1[1,11] <- 0

pi.avoiding.math.Level.1[1,12] <- 0

pi.avoiding.math.Level.1[1,13] <- pi.avoiding.math.Level.1[1,18] # Saw As One Unit

pi.avoiding.math.Level.1[1,14] <- 0 # Saw As Wholes

pi.avoiding.math.Level.1[1,15] <- pi.avoiding.math.Level.1[1,18]

pi.avoiding.math.Level.1[1,16] <- 0

pi.avoiding.math.Level.1[1,17] ~ dbeta(pi.avoiding.math.alpha[1,17],pi.avoiding.math.beta[1,17])

pi.avoiding.math.Level.1[1,18] ~ dbeta(pi.avoiding.math.alpha[1,18],pi.avoiding.math.beta[1,18]) # Unknown Error


###########################################################################################
# Specify the prior for the transition matrices for latent variables
# For level 2
###########################################################################################

###########################################################################################
# Specify the prior for the mastery transition matrix for whole numbers
###########################################################################################

for(k in 1:K){
  pi.whole.numbers.Level.2[2,k] <- 1 
} # closes loop over k

pi.whole.numbers.Level.2[1,1] ~ dbeta(pi.whole.numbers.alpha[1,1],pi.whole.numbers.beta[1,1]) # Standard solution
pi.whole.numbers.Level.2[1,2] <- 0 # Fractional solution
pi.whole.numbers.Level.2[1,3] ~ dbeta(pi.whole.numbers.alpha[1,3],pi.whole.numbers.beta[1,3]) # Alternate solution
pi.whole.numbers.Level.2[1,4] ~ dbeta(pi.whole.numbers.alpha[1,4],pi.whole.numbers.beta[1,4]) # Incomplete solution
pi.whole.numbers.Level.2[1,5] <- 0 # Shortcut solution

pi.whole.numbers.Level.2[1,6] <- 0 # Reset solution

pi.whole.numbers.Level.2[1,7] <- 0 # Wrong Direction
pi.whole.numbers.Level.2[1,8] <- 0 # Skipped key
 
pi.whole.numbers.Level.2[1,9] <- 0 # Wrong Numerator
pi.whole.numbers.Level.2[1,10] <- 0         # Saw As Mixed Number

pi.whole.numbers.Level.2[1,11] ~ dbeta(pi.whole.numbers.alpha[1,11],pi.whole.numbers.beta[1,11]) # Counted Hash Marks
pi.whole.numbers.Level.2[1,12] <- pi.whole.numbers.Level.2[1,11] # Counted Hash Marks and Posts

pi.whole.numbers.Level.2[1,13] ~ dbeta(pi.whole.numbers.alpha[1,13],pi.whole.numbers.beta[1,13])   # Saw As One Unit
pi.whole.numbers.Level.2[1,14] <- 0 # Saw As Wholes

pi.whole.numbers.Level.2[1,15] ~ dbeta(pi.whole.numbers.alpha[1,15],pi.whole.numbers.beta[1,15]) # Saw As One Unit and Counted Hash Marks
pi.whole.numbers.Level.2[1,16] <- pi.whole.numbers.Level.2[1,15] # Saw As One Unit and Counted Hash Marks and Posts

pi.whole.numbers.Level.2[1,17] <- 0 # Everything In Order

pi.whole.numbers.Level.2[1,18] ~ dbeta(pi.whole.numbers.alpha[1,18],pi.whole.numbers.beta[1,18]) # Unknown Error


###########################################################################################
# Specify the prior for the transition matrix for Partitioning Error
# This is the probability of transitioning *to* (acquiring, keeping) a misconception
###########################################################################################

pi.partitioning.error.Level.2[2,1] ~ dbeta(pi.partitioning.error.alpha[2,1],pi.partitioning.error.beta[2,1]) # Standard solution
pi.partitioning.error.Level.2[2,2] <- 0 # Fractional solution
pi.partitioning.error.Level.2[2,3] ~ dbeta(pi.partitioning.error.alpha[2,3],pi.partitioning.error.beta[2,3]) # Alternate solution
pi.partitioning.error.Level.2[2,4] <- pi.partitioning.error.Level.2[2,3] # Incomplete solution
pi.partitioning.error.Level.2[2,5] <- 0 # Shortcut solution

pi.partitioning.error.Level.2[2,6] <- 0 # Reset solution

pi.partitioning.error.Level.2[2,7] <- 0 # Wrong Direction
pi.partitioning.error.Level.2[2,8] <- 0 # Skipped key

pi.partitioning.error.Level.2[2,9] <- 0 # Wrong Numerator
pi.partitioning.error.Level.2[2,10] <- 0         # Saw As Mixed Number

pi.partitioning.error.Level.2[2,11] ~ dbeta(pi.partitioning.error.alpha[2,11],pi.partitioning.error.beta[2,11]) # Counted Hash Marks
pi.partitioning.error.Level.2[2,12] <- pi.partitioning.error.Level.2[2,11] # Counted Hash Marks and Posts

pi.partitioning.error.Level.2[2,13] ~ dbeta(pi.partitioning.error.alpha[2,13],pi.partitioning.error.beta[2,13]) # Saw As One Unit
pi.partitioning.error.Level.2[2,14] <- 0 # Saw As Wholes

pi.partitioning.error.Level.2[2,15] <- pi.partitioning.error.Level.2[2,11] # Saw As One Unit and Counted Hash Marks
pi.partitioning.error.Level.2[2,16] <- pi.partitioning.error.Level.2[2,11] # Saw As One Unit and Counted Hash Marks and Posts

pi.partitioning.error.Level.2[2,17] <- 0 # Everything In Order

pi.partitioning.error.Level.2[2,18] <- pi.partitioning.error.Level.2[2,13] # Unknown Error


pi.partitioning.error.Level.2[1,1] <- 0          # Standard solution
pi.partitioning.error.Level.2[1,2] <- 0          # Fractional solution
pi.partitioning.error.Level.2[1,3] <- 0          # Alternate solution
pi.partitioning.error.Level.2[1,4] <- 0          # Incomplete solution
pi.partitioning.error.Level.2[1,5] <- 0          # Shortcut solution

pi.partitioning.error.Level.2[1,6] <- 0          # Reset solution

pi.partitioning.error.Level.2[1,7] <- 0          # Wrong Direction
pi.partitioning.error.Level.2[1,8] <- 0          # Skipped key

pi.partitioning.error.Level.2[1,9] <- 0 # Wrong Numerator
pi.partitioning.error.Level.2[1,10] <- 0         # Saw As Mixed Number

pi.partitioning.error.Level.2[1,11] ~ dbeta(pi.partitioning.error.alpha[1,11],pi.partitioning.error.beta[1,11]) # Counted Hash Marks
pi.partitioning.error.Level.2[1,12] <- pi.partitioning.error.Level.2[1,11] # Counted Hash Marks and Posts

pi.partitioning.error.Level.2[1,13] ~ dbeta(pi.partitioning.error.alpha[1,13],pi.partitioning.error.beta[1,13]) # Saw As One Unit
pi.partitioning.error.Level.2[1,14] <- 0 # Saw As Wholes

pi.partitioning.error.Level.2[1,15] <- pi.partitioning.error.Level.2[1,11] # Saw As One Unit and Counted Hash Marks
pi.partitioning.error.Level.2[1,16] <- pi.partitioning.error.Level.2[1,11] # Saw As One Unit and Counted Hash Marks and Posts

pi.partitioning.error.Level.2[1,17] <- 0 # Everything In Order

pi.partitioning.error.Level.2[1,18] <- pi.partitioning.error.Level.2[1,13] # Unknown Error


###########################################################################################
# Specify the prior for the transition matrix for Unitizing Error
# This is the probability of transitioning *to* (acquiring, keeping) a misconception
###########################################################################################

pi.unitizing.error.Level.2[2,1] ~ dbeta(pi.unitizing.error.alpha[2,1],pi.unitizing.error.beta[2,1]) # Standard solution
pi.unitizing.error.Level.2[2,2] <- 0  # Fractional solution
pi.unitizing.error.Level.2[2,3] ~ dbeta(pi.unitizing.error.alpha[2,3],pi.unitizing.error.beta[2,3])  # Alternate solution
pi.unitizing.error.Level.2[2,4] <- pi.unitizing.error.Level.2[2,3] # Incomplete solution
pi.unitizing.error.Level.2[2,5] <- 0 # Shortcut solution

pi.unitizing.error.Level.2[2,6] <- 0 # Reset solution

pi.unitizing.error.Level.2[2,7] <- 0 # Wrong Direction
pi.unitizing.error.Level.2[2,8] <- 0 # Skipped key

pi.unitizing.error.Level.2[2,9] <- 0  # Wrong Numerator
pi.unitizing.error.Level.2[2,10] <- 0         # Saw As Mixed Number

pi.unitizing.error.Level.2[2,11] ~ dbeta(pi.unitizing.error.alpha[2,11],pi.unitizing.error.beta[2,11]) # Counted Hash Marks
pi.unitizing.error.Level.2[2,12] <- pi.unitizing.error.Level.2[2,11] # Counted Hash Marks and Posts

pi.unitizing.error.Level.2[2,13] ~ dbeta(pi.unitizing.error.alpha[2,13],pi.unitizing.error.beta[2,13])  # Saw As One Unit
pi.unitizing.error.Level.2[2,14] <- 0 # Saw As Wholes

pi.unitizing.error.Level.2[2,15] <- pi.unitizing.error.Level.2[2,13] # Saw As One Unit and Counted Hash Marks
pi.unitizing.error.Level.2[2,16] <- pi.unitizing.error.Level.2[2,13] # Saw As One Unit and Counted Hash Marks and Posts

pi.unitizing.error.Level.2[2,17] <- 0 # Everything In Order

pi.unitizing.error.Level.2[2,18] <- pi.unitizing.error.Level.2[2,11] # Unknown Error


pi.unitizing.error.Level.2[1,1] <- 0          # Standard solution
pi.unitizing.error.Level.2[1,2] <- 0          # Fractional solution
pi.unitizing.error.Level.2[1,3] <- 0          # Alternate solution
pi.unitizing.error.Level.2[1,4] <- 0          # Incomplete solution
pi.unitizing.error.Level.2[1,5] <- 0          # Shortcut solution

pi.unitizing.error.Level.2[1,6] <- 0          # Reset solution

pi.unitizing.error.Level.2[1,7] <- 0          # Wrong Direction
pi.unitizing.error.Level.2[1,8] <- 0          # Skipped key

pi.unitizing.error.Level.2[1,9] <- 0  # Wrong Numerator
pi.unitizing.error.Level.2[1,10] <- 0         # Saw As Mixed Number

pi.unitizing.error.Level.2[1,11] ~ dbeta(pi.unitizing.error.alpha[1,11],pi.unitizing.error.beta[1,11]) # Counted Hash Marks
pi.unitizing.error.Level.2[1,12] <- pi.unitizing.error.Level.2[1,11] # Counted Hash Marks and Posts

pi.unitizing.error.Level.2[1,13] ~ dbeta(pi.unitizing.error.alpha[1,13],pi.unitizing.error.beta[1,13])  # Saw As One Unit
pi.unitizing.error.Level.2[1,14] <- 0 # Saw As Wholes

pi.unitizing.error.Level.2[1,15] <- pi.unitizing.error.Level.2[1,13] # Saw As One Unit and Counted Hash Marks
pi.unitizing.error.Level.2[1,16] <- pi.unitizing.error.Level.2[1,13] # Saw As One Unit and Counted Hash Marks and Posts

pi.unitizing.error.Level.2[1,17] <- 0 # Everything In Order

pi.unitizing.error.Level.2[1,18] <- pi.unitizing.error.Level.2[1,11] # Unknown Error


###########################################################################################
# Specify the prior for the transition matrices for latent variables
# For level 3
###########################################################################################


###########################################################################################
# Specify the prior for the mastery transition matrix for whole numbers
###########################################################################################

for(k in 1:K){
  pi.whole.numbers.Level.3[2,k] <- 1 
} # closes loop over k

pi.whole.numbers.Level.3[1,1] ~ dbeta(pi.whole.numbers.alpha[1,1],pi.whole.numbers.beta[1,1]) # Standard solution
pi.whole.numbers.Level.3[1,2] <- 0 # Fractional solution
pi.whole.numbers.Level.3[1,3] ~ dbeta(pi.whole.numbers.alpha[1,3],pi.whole.numbers.beta[1,3]) # Alternate solution
pi.whole.numbers.Level.3[1,4] ~ dbeta(pi.whole.numbers.alpha[1,4],pi.whole.numbers.beta[1,4]) # Incomplete solution
pi.whole.numbers.Level.3[1,5] <- 0 # Shortcut solution

pi.whole.numbers.Level.3[1,6] <- 0 # Reset solution

pi.whole.numbers.Level.3[1,7] <- 0 # Wrong Direction
pi.whole.numbers.Level.3[1,8] <- 0 # Skipped key
 
pi.whole.numbers.Level.3[1,9] <- 0 # Wrong Numerator
pi.whole.numbers.Level.3[1,10] <- 0         # Saw As Mixed Number

pi.whole.numbers.Level.3[1,11] ~ dbeta(pi.whole.numbers.alpha[1,11],pi.whole.numbers.beta[1,11]) # Counted Hash Marks
pi.whole.numbers.Level.3[1,12] <- pi.whole.numbers.Level.3[1,11] # Counted Hash Marks and Posts

pi.whole.numbers.Level.3[1,13] ~ dbeta(pi.whole.numbers.alpha[1,13],pi.whole.numbers.beta[1,13])   # Saw As One Unit
pi.whole.numbers.Level.3[1,14] <- 0 # Saw As Wholes

pi.whole.numbers.Level.3[1,15] ~ dbeta(pi.whole.numbers.alpha[1,15],pi.whole.numbers.beta[1,15]) # Saw As One Unit and Counted Hash Marks
pi.whole.numbers.Level.3[1,16] <- pi.whole.numbers.Level.3[1,15] # Saw As One Unit and Counted Hash Marks and Posts

pi.whole.numbers.Level.3[1,17] ~ dbeta(pi.whole.numbers.alpha[1,17],pi.whole.numbers.beta[1,17]) # Everything In Order

pi.whole.numbers.Level.3[1,18] ~ dbeta(pi.whole.numbers.alpha[1,18],pi.whole.numbers.beta[1,18]) # Unknown Error


###########################################################################################
# Specify the prior for the transition matrix for Partitioning Error
# This is the probability of transitioning *to* (acquiring, keeping) a misconception
###########################################################################################

pi.partitioning.error.Level.3[2,1] ~ dbeta(pi.partitioning.error.alpha[2,1],pi.partitioning.error.beta[2,1]) # Standard solution
#pi.partitioning.error.Level.3[2,2] ~ dbeta(pi.partitioning.error.alpha[2,2],pi.partitioning.error.beta[2,2]) # Fractional solution
pi.partitioning.error.Level.3[2,2] <- 0 # Fractional solution
pi.partitioning.error.Level.3[2,3] ~ dbeta(pi.partitioning.error.alpha[2,3],pi.partitioning.error.beta[2,3]) # Alternate solution
pi.partitioning.error.Level.3[2,4] <- pi.partitioning.error.Level.3[2,3] # Incomplete solution
pi.partitioning.error.Level.3[2,5] <- 0 # Shortcut solution

pi.partitioning.error.Level.3[2,6] <- 0 # Reset solution

pi.partitioning.error.Level.3[2,7] <- 0 # Wrong Direction
pi.partitioning.error.Level.3[2,8] <- 0 # Skipped key

pi.partitioning.error.Level.3[2,9] <- 0 # Wrong Numerator
pi.partitioning.error.Level.3[2,10] <- 0         # Saw As Mixed Number

pi.partitioning.error.Level.3[2,11] ~ dbeta(pi.partitioning.error.alpha[2,11],pi.partitioning.error.beta[2,11]) # Counted Hash Marks
pi.partitioning.error.Level.3[2,12] <- pi.partitioning.error.Level.3[2,11] # Counted Hash Marks and Posts

pi.partitioning.error.Level.3[2,13] ~ dbeta(pi.partitioning.error.alpha[2,13],pi.partitioning.error.beta[2,13]) # Saw As One Unit
pi.partitioning.error.Level.3[2,14] <- 0 # Saw As Wholes

pi.partitioning.error.Level.3[2,15] <- pi.partitioning.error.Level.3[2,11] # Saw As One Unit and Counted Hash Marks
pi.partitioning.error.Level.3[2,16] <- pi.partitioning.error.Level.3[2,11] # Saw As One Unit and Counted Hash Marks and Posts

pi.partitioning.error.Level.3[2,17] <- pi.partitioning.error.Level.3[2,13] # Everything In Order

pi.partitioning.error.Level.3[2,18] <- pi.partitioning.error.Level.3[2,13] # Unknown Error


pi.partitioning.error.Level.3[1,1] <- 0          # Standard solution
pi.partitioning.error.Level.3[1,2] <- 0          # Fractional solution
pi.partitioning.error.Level.3[1,3] <- 0          # Alternate solution
pi.partitioning.error.Level.3[1,4] <- 0          # Incomplete solution
pi.partitioning.error.Level.3[1,5] <- 0          # Shortcut solution

pi.partitioning.error.Level.3[1,6] <- 0          # Reset solution

pi.partitioning.error.Level.3[1,7] <- 0          # Wrong Direction
pi.partitioning.error.Level.3[1,8] <- 0          # Skipped key

pi.partitioning.error.Level.3[1,9] <- 0 # Wrong Numerator
pi.partitioning.error.Level.3[1,10] <- 0         # Saw As Mixed Number

pi.partitioning.error.Level.3[1,11] ~ dbeta(pi.partitioning.error.alpha[1,11],pi.partitioning.error.beta[1,11]) # Counted Hash Marks
pi.partitioning.error.Level.3[1,12] <- pi.partitioning.error.Level.3[1,11] # Counted Hash Marks and Posts

pi.partitioning.error.Level.3[1,13] ~ dbeta(pi.partitioning.error.alpha[1,13],pi.partitioning.error.beta[1,13]) # Saw As One Unit
pi.partitioning.error.Level.3[1,14] <- 0 # Saw As Wholes

pi.partitioning.error.Level.3[1,15] <- pi.partitioning.error.Level.3[1,11] # Saw As One Unit and Counted Hash Marks
pi.partitioning.error.Level.3[1,16] <- pi.partitioning.error.Level.3[1,11] # Saw As One Unit and Counted Hash Marks and Posts

pi.partitioning.error.Level.3[1,17] <- pi.partitioning.error.Level.3[1,13] # Everything In Order

pi.partitioning.error.Level.3[1,18] <- pi.partitioning.error.Level.3[1,13] # Unknown Error


###########################################################################################
# Specify the prior for the transition matrix for Unitizing Error
# This is the probability of transitioning *to* (acquiring, keeping) a misconception
###########################################################################################

pi.unitizing.error.Level.3[2,1] ~ dbeta(pi.unitizing.error.alpha[2,1],pi.unitizing.error.beta[2,1]) # Standard solution
pi.unitizing.error.Level.3[2,2] <- 0  # Fractional solution
pi.unitizing.error.Level.3[2,3] ~ dbeta(pi.unitizing.error.alpha[2,3],pi.unitizing.error.beta[2,3])  # Alternate solution
pi.unitizing.error.Level.3[2,4] <- pi.unitizing.error.Level.3[2,3] # Incomplete solution
pi.unitizing.error.Level.3[2,5] <- 0 # Shortcut solution

pi.unitizing.error.Level.3[2,6] <- 0 # Reset solution

pi.unitizing.error.Level.3[2,7] <- 0 # Wrong Direction
pi.unitizing.error.Level.3[2,8] <- 0 # Skipped key

pi.unitizing.error.Level.3[2,9] <- 0  # Wrong Numerator
pi.unitizing.error.Level.3[2,10] <- 0         # Saw As Mixed Number

pi.unitizing.error.Level.3[2,11] ~ dbeta(pi.unitizing.error.alpha[2,11],pi.unitizing.error.beta[2,11]) # Counted Hash Marks
pi.unitizing.error.Level.3[2,12] <- pi.unitizing.error.Level.3[2,11] # Counted Hash Marks and Posts

pi.unitizing.error.Level.3[2,13] ~ dbeta(pi.unitizing.error.alpha[2,13],pi.unitizing.error.beta[2,13])  # Saw As One Unit
pi.unitizing.error.Level.3[2,14] <- 0 # Saw As Wholes

pi.unitizing.error.Level.3[2,15] <- pi.unitizing.error.Level.3[2,13] # Saw As One Unit and Counted Hash Marks
pi.unitizing.error.Level.3[2,16] <- pi.unitizing.error.Level.3[2,13] # Saw As One Unit and Counted Hash Marks and Posts

pi.unitizing.error.Level.3[2,17] <- pi.unitizing.error.Level.3[2,11] # Everything In Order

pi.unitizing.error.Level.3[2,18] <- pi.unitizing.error.Level.3[2,11] # Unknown Error


pi.unitizing.error.Level.3[1,1] <- 0          # Standard solution
pi.unitizing.error.Level.3[1,2] <- 0          # Fractional solution
pi.unitizing.error.Level.3[1,3] <- 0          # Alternate solution
pi.unitizing.error.Level.3[1,4] <- 0          # Incomplete solution
pi.unitizing.error.Level.3[1,5] <- 0          # Shortcut solution

pi.unitizing.error.Level.3[1,6] <- 0          # Reset solution

pi.unitizing.error.Level.3[1,7] <- 0          # Wrong Direction
pi.unitizing.error.Level.3[1,8] <- 0          # Skipped key

pi.unitizing.error.Level.3[1,9] <- 0  # Wrong Numerator
pi.unitizing.error.Level.3[1,10] <- 0         # Saw As Mixed Number

pi.unitizing.error.Level.3[1,11] ~ dbeta(pi.unitizing.error.alpha[1,11],pi.unitizing.error.beta[1,11]) # Counted Hash Marks
pi.unitizing.error.Level.3[1,12] <- pi.unitizing.error.Level.3[1,11] # Counted Hash Marks and Posts

pi.unitizing.error.Level.3[1,13] ~ dbeta(pi.unitizing.error.alpha[1,13],pi.unitizing.error.beta[1,13])  # Saw As One Unit
pi.unitizing.error.Level.3[1,14] <- 0 # Saw As Wholes

pi.unitizing.error.Level.3[1,15] <- pi.unitizing.error.Level.3[1,13] # Saw As One Unit and Counted Hash Marks
pi.unitizing.error.Level.3[1,16] <- pi.unitizing.error.Level.3[1,13] # Saw As One Unit and Counted Hash Marks and Posts

pi.unitizing.error.Level.3[1,17] <- pi.unitizing.error.Level.3[1,11] # Everything In Order

pi.unitizing.error.Level.3[1,18] <- pi.unitizing.error.Level.3[1,11] # Unknown Error


###########################################################################################
# Specify the prior for the transition matrix for Avoiding Math
# This is the probability of transitioning *to* (acquiring, keeping) a misconception
###########################################################################################

pi.avoiding.math.Level.3[2,1] ~ dbeta(pi.avoiding.math.alpha[2,1],pi.avoiding.math.beta[2,1]) # Standard solution
pi.avoiding.math.Level.3[2,2] <- 0  # Fractional solution
pi.avoiding.math.Level.3[2,3] ~ dbeta(pi.avoiding.math.alpha[2,3],pi.avoiding.math.beta[2,3])  # Alternate solution
pi.avoiding.math.Level.3[2,4] <- pi.avoiding.math.Level.3[2,3] # Incomplete solution
pi.avoiding.math.Level.3[2,5] <- 0 # Shortcut solution

pi.avoiding.math.Level.3[2,6] <- 0 # Reset solution

pi.avoiding.math.Level.3[2,7] <- 0 # Wrong Direction
pi.avoiding.math.Level.3[2,8] <- 0 # Skipped key

pi.avoiding.math.Level.3[2,9] <- 0  # Wrong Numerator
pi.avoiding.math.Level.3[2,10] <- 0         # Saw As Mixed Number

pi.avoiding.math.Level.3[2,11] ~ dbeta(pi.avoiding.math.alpha[2,11],pi.avoiding.math.beta[2,11]) # Counted Hash Marks
pi.avoiding.math.Level.3[2,12] <- pi.avoiding.math.Level.3[2,11] # Counted Hash Marks and Posts

pi.avoiding.math.Level.3[2,13] <- pi.avoiding.math.Level.3[2,11] # Saw As One Unit
pi.avoiding.math.Level.3[2,14] <- 0 # Saw As Wholes

pi.avoiding.math.Level.3[2,15] <- pi.avoiding.math.Level.3[2,11] # Saw As One Unit and Counted Hash Marks
pi.avoiding.math.Level.3[2,16] <- pi.avoiding.math.Level.3[2,11] # Saw As One Unit and Counted Hash Marks and Posts

pi.avoiding.math.Level.3[2,17] ~ dbeta(pi.avoiding.math.alpha[2,17],pi.avoiding.math.beta[2,17]) # Everything In Order

pi.avoiding.math.Level.3[2,18] <- pi.avoiding.math.Level.3[2,11] # Unknown Error


pi.avoiding.math.Level.3[1,1] <- 0          # Standard solution
pi.avoiding.math.Level.3[1,2] <- 0          # Fractional solution
pi.avoiding.math.Level.3[1,3] <- 0          # Alternate solution
pi.avoiding.math.Level.3[1,4] <- 0          # Incomplete solution
pi.avoiding.math.Level.3[1,5] <- 0          # Shortcut solution

pi.avoiding.math.Level.3[1,6] <- 0          # Reset solution

pi.avoiding.math.Level.3[1,7] <- 0          # Wrong Direction
pi.avoiding.math.Level.3[1,8] <- 0          # Skipped key

pi.avoiding.math.Level.3[1,9] <- 0  # Wrong Numerator
pi.avoiding.math.Level.3[1,10] <- 0         # Saw As Mixed Number

pi.avoiding.math.Level.3[1,11] ~ dbeta(pi.avoiding.math.alpha[1,11],pi.avoiding.math.beta[1,11]) # Counted Hash Marks
pi.avoiding.math.Level.3[1,12] <- pi.avoiding.math.Level.3[1,11] # Counted Hash Marks and Posts

pi.avoiding.math.Level.3[1,13] <- pi.avoiding.math.Level.3[1,11] # Saw As One Unit
pi.avoiding.math.Level.3[1,14] <- 0 # Saw As Wholes

pi.avoiding.math.Level.3[1,15] <- pi.avoiding.math.Level.3[1,11] # Saw As One Unit and Counted Hash Marks
pi.avoiding.math.Level.3[1,16] <- pi.avoiding.math.Level.3[1,11] # Saw As One Unit and Counted Hash Marks and Posts

pi.avoiding.math.Level.3[1,17] ~ dbeta(pi.avoiding.math.alpha[1,17],pi.avoiding.math.beta[1,17]) # Everything In Order

pi.avoiding.math.Level.3[1,18] <- pi.avoiding.math.Level.3[1,11] # Unknown Error


###########################################################################################
# Specify the conditional probability table
# Note the use of the index j here, set to be equal to the level
###########################################################################################


for(whole.numbers.value in 1:2){
  for(partitioning.error.value in 1:2){
    for(unitizing.error.value in 1:2){
      for(avoiding.math.value in 1:2){


        for(j in 1:1){
          for(k in 1:1){
            eta[whole.numbers.value, partitioning.error.value, unitizing.error.value, avoiding.math.value, j, k] <- lambda.0[j,k] + lambda[j,k,1]*(whole.numbers.value - 1) + lambda[j,k,2]*(partitioning.error.value - 1) + lambda[j,k,3]*(unitizing.error.value - 1) + lambda[j,k,4]*(avoiding.math.value - 1)
            exp.eta[whole.numbers.value, partitioning.error.value, unitizing.error.value, avoiding.math.value, j, k] <- exp(eta[whole.numbers.value, partitioning.error.value, unitizing.error.value, avoiding.math.value, j, k])        
          }  
          for(k in 3:3){
            eta[whole.numbers.value, partitioning.error.value, unitizing.error.value, avoiding.math.value, j, k] <- lambda.0[j,k] + lambda[j,k,1]*(whole.numbers.value - 1) + lambda[j,k,2]*(partitioning.error.value - 1) + lambda[j,k,3]*(unitizing.error.value - 1) + lambda[j,k,4]*(avoiding.math.value - 1) 
           exp.eta[whole.numbers.value, partitioning.error.value, unitizing.error.value, avoiding.math.value, j, k] <- exp(eta[whole.numbers.value, partitioning.error.value, unitizing.error.value, avoiding.math.value, j, k])        
          }  
        
          for(k in 13:13){
            eta[whole.numbers.value, partitioning.error.value, unitizing.error.value, avoiding.math.value, j, k] <- lambda.0[j,k] + lambda[j,k,1]*(whole.numbers.value - 1) + lambda[j,k,2]*(partitioning.error.value - 1) + lambda[j,k,3]*(unitizing.error.value - 1) + lambda[j,k,4]*(avoiding.math.value - 1) 
            exp.eta[whole.numbers.value, partitioning.error.value, unitizing.error.value, avoiding.math.value, j, k] <- exp(eta[whole.numbers.value, partitioning.error.value, unitizing.error.value, avoiding.math.value, j, k])        
          }  
          for(k in 15:15){
            eta[whole.numbers.value, partitioning.error.value, unitizing.error.value, avoiding.math.value, j, k] <- lambda.0[j,k] + lambda[j,k,1]*(whole.numbers.value - 1) + lambda[j,k,2]*(partitioning.error.value - 1) + lambda[j,k,3]*(unitizing.error.value - 1) + lambda[j,k,4]*(avoiding.math.value - 1) 
            exp.eta[whole.numbers.value, partitioning.error.value, unitizing.error.value, avoiding.math.value, j, k] <- exp(eta[whole.numbers.value, partitioning.error.value, unitizing.error.value, avoiding.math.value, j, k])        
          }  
          for(k in 17:18){
            eta[whole.numbers.value, partitioning.error.value, unitizing.error.value, avoiding.math.value, j, k] <- lambda.0[j,k] + lambda[j,k,1]*(whole.numbers.value - 1) + lambda[j,k,2]*(partitioning.error.value - 1) + lambda[j,k,3]*(unitizing.error.value - 1) + lambda[j,k,4]*(avoiding.math.value - 1) 
            exp.eta[whole.numbers.value, partitioning.error.value, unitizing.error.value, avoiding.math.value, j, k] <- exp(eta[whole.numbers.value, partitioning.error.value, unitizing.error.value, avoiding.math.value, j, k])        
          }  

          exp.eta[whole.numbers.value, partitioning.error.value, unitizing.error.value, avoiding.math.value, j, 2] <- 0
          exp.eta[whole.numbers.value, partitioning.error.value, unitizing.error.value, avoiding.math.value, j, 4] <- 0
          exp.eta[whole.numbers.value, partitioning.error.value, unitizing.error.value, avoiding.math.value, j, 5] <- 0
          exp.eta[whole.numbers.value, partitioning.error.value, unitizing.error.value, avoiding.math.value, j, 9] <- 0
          exp.eta[whole.numbers.value, partitioning.error.value, unitizing.error.value, avoiding.math.value, j, 10] <- 0
          exp.eta[whole.numbers.value, partitioning.error.value, unitizing.error.value, avoiding.math.value, j, 11] <- 0
          exp.eta[whole.numbers.value, partitioning.error.value, unitizing.error.value, avoiding.math.value, j, 12] <- 0
          exp.eta[whole.numbers.value, partitioning.error.value, unitizing.error.value, avoiding.math.value, j, 14] <- 0
          exp.eta[whole.numbers.value, partitioning.error.value, unitizing.error.value, avoiding.math.value, j, 16] <- 0
          
          exp.eta[whole.numbers.value, partitioning.error.value, unitizing.error.value, avoiding.math.value, j, 6] <- 0
          exp.eta[whole.numbers.value, partitioning.error.value, unitizing.error.value, avoiding.math.value, j, 7] <- 0
          exp.eta[whole.numbers.value, partitioning.error.value, unitizing.error.value, avoiding.math.value, j, 8] <- 0

          for(k in 1:K){
            pi[whole.numbers.value, partitioning.error.value, unitizing.error.value, avoiding.math.value, j, k] <- exp.eta[whole.numbers.value, partitioning.error.value, unitizing.error.value, avoiding.math.value, j, k]/sum(exp.eta[whole.numbers.value, partitioning.error.value, unitizing.error.value, avoiding.math.value, j, 1:K])
          } # closes loop over k
        } # closes loop over j


        for(j in 2:2){
          for(k in 1:1){
            eta[whole.numbers.value, partitioning.error.value, unitizing.error.value, avoiding.math.value, j, k] <- lambda.0[j,k] + lambda[j,k,1]*(whole.numbers.value - 1) + lambda[j,k,2]*(partitioning.error.value - 1) + lambda[j,k,3]*(unitizing.error.value - 1)
            exp.eta[whole.numbers.value, partitioning.error.value, unitizing.error.value, avoiding.math.value, j, k] <- exp(eta[whole.numbers.value, partitioning.error.value, unitizing.error.value, avoiding.math.value, j, k])        
          }  
          for(k in 3:4){
            eta[whole.numbers.value, partitioning.error.value, unitizing.error.value, avoiding.math.value, j, k] <- lambda.0[j,k] + lambda[j,k,1]*(whole.numbers.value - 1) + lambda[j,k,2]*(partitioning.error.value - 1) + lambda[j,k,3]*(unitizing.error.value - 1)
            exp.eta[whole.numbers.value, partitioning.error.value, unitizing.error.value, avoiding.math.value, j, k] <- exp(eta[whole.numbers.value, partitioning.error.value, unitizing.error.value, avoiding.math.value, j, k])        
          }  
        
          for(k in 11:13){
            eta[whole.numbers.value, partitioning.error.value, unitizing.error.value, avoiding.math.value, j, k] <- lambda.0[j,k] + lambda[j,k,1]*(whole.numbers.value - 1) + lambda[j,k,2]*(partitioning.error.value - 1) + lambda[j,k,3]*(unitizing.error.value - 1)
            exp.eta[whole.numbers.value, partitioning.error.value, unitizing.error.value, avoiding.math.value, j, k] <- exp(eta[whole.numbers.value, partitioning.error.value, unitizing.error.value, avoiding.math.value, j, k])        
          }  
          for(k in 15:16){
            eta[whole.numbers.value, partitioning.error.value, unitizing.error.value, avoiding.math.value, j, k] <- lambda.0[j,k] + lambda[j,k,1]*(whole.numbers.value - 1) + lambda[j,k,2]*(partitioning.error.value - 1) + lambda[j,k,3]*(unitizing.error.value - 1)
            exp.eta[whole.numbers.value, partitioning.error.value, unitizing.error.value, avoiding.math.value, j, k] <- exp(eta[whole.numbers.value, partitioning.error.value, unitizing.error.value, avoiding.math.value, j, k])        
          }  
          for(k in 18:18){
            eta[whole.numbers.value, partitioning.error.value, unitizing.error.value, avoiding.math.value, j, k] <- lambda.0[j,k] + lambda[j,k,1]*(whole.numbers.value - 1) + lambda[j,k,2]*(partitioning.error.value - 1) + lambda[j,k,3]*(unitizing.error.value - 1)
            exp.eta[whole.numbers.value, partitioning.error.value, unitizing.error.value, avoiding.math.value, j, k] <- exp(eta[whole.numbers.value, partitioning.error.value, unitizing.error.value, avoiding.math.value, j, k])        
          }  

          exp.eta[whole.numbers.value, partitioning.error.value, unitizing.error.value, avoiding.math.value, j, 2] <- 0
          exp.eta[whole.numbers.value, partitioning.error.value, unitizing.error.value, avoiding.math.value, j, 5] <- 0
          exp.eta[whole.numbers.value, partitioning.error.value, unitizing.error.value, avoiding.math.value, j, 9] <- 0
          exp.eta[whole.numbers.value, partitioning.error.value, unitizing.error.value, avoiding.math.value, j, 10] <- 0
          exp.eta[whole.numbers.value, partitioning.error.value, unitizing.error.value, avoiding.math.value, j, 14] <- 0
          exp.eta[whole.numbers.value, partitioning.error.value, unitizing.error.value, avoiding.math.value, j, 17] <- 0

          exp.eta[whole.numbers.value, partitioning.error.value, unitizing.error.value, avoiding.math.value, j, 6] <- 0
          exp.eta[whole.numbers.value, partitioning.error.value, unitizing.error.value, avoiding.math.value, j, 7] <- 0
          exp.eta[whole.numbers.value, partitioning.error.value, unitizing.error.value, avoiding.math.value, j, 8] <- 0

          for(k in 1:K){
            pi[whole.numbers.value, partitioning.error.value, unitizing.error.value, avoiding.math.value, j, k] <- exp.eta[whole.numbers.value, partitioning.error.value, unitizing.error.value, avoiding.math.value, j, k]/sum(exp.eta[whole.numbers.value, partitioning.error.value, unitizing.error.value, avoiding.math.value, j, 1:K])
          } # closes loop over k
        } # closes loop over j


        for(j in 3:3){
          for(k in 1:1){
            eta[whole.numbers.value, partitioning.error.value, unitizing.error.value, avoiding.math.value, j, k] <- lambda.0[j,k] + lambda[j,k,1]*(whole.numbers.value - 1) + lambda[j,k,2]*(partitioning.error.value - 1) + lambda[j,k,3]*(unitizing.error.value - 1) + lambda[j,k,4]*(avoiding.math.value - 1)
            exp.eta[whole.numbers.value, partitioning.error.value, unitizing.error.value, avoiding.math.value, j, k] <- exp(eta[whole.numbers.value, partitioning.error.value, unitizing.error.value, avoiding.math.value, j, k])        
          }  
          for(k in 3:4){
            eta[whole.numbers.value, partitioning.error.value, unitizing.error.value, avoiding.math.value, j, k] <- lambda.0[j,k] + lambda[j,k,1]*(whole.numbers.value - 1) + lambda[j,k,2]*(partitioning.error.value - 1) + lambda[j,k,3]*(unitizing.error.value - 1) + lambda[j,k,4]*(avoiding.math.value - 1) 
           exp.eta[whole.numbers.value, partitioning.error.value, unitizing.error.value, avoiding.math.value, j, k] <- exp(eta[whole.numbers.value, partitioning.error.value, unitizing.error.value, avoiding.math.value, j, k])        
          }  
        

          #######################################################
          # No longer modeling game errors
          #######################################################
          #for(k in 6:8){
          #  eta[whole.numbers.value, partitioning.error.value, unitizing.error.value, avoiding.math.value, j, k] <- lambda.0[j,k] + lambda[j,k,1]*(whole.numbers.value - 1) + lambda[j,k,2]*(partitioning.error.value - 1) + lambda[j,k,3]*(unitizing.error.value - 1) + lambda[j,k,4]*(avoiding.math.value - 1) 
          #  exp.eta[whole.numbers.value, partitioning.error.value, unitizing.error.value, avoiding.math.value, j, k] <- exp(eta[whole.numbers.value, partitioning.error.value, unitizing.error.value, avoiding.math.value, j, k])        
          #} 


          for(k in 11:13){
            eta[whole.numbers.value, partitioning.error.value, unitizing.error.value, avoiding.math.value, j, k] <- lambda.0[j,k] + lambda[j,k,1]*(whole.numbers.value - 1) + lambda[j,k,2]*(partitioning.error.value - 1) + lambda[j,k,3]*(unitizing.error.value - 1) + lambda[j,k,4]*(avoiding.math.value - 1) 
            exp.eta[whole.numbers.value, partitioning.error.value, unitizing.error.value, avoiding.math.value, j, k] <- exp(eta[whole.numbers.value, partitioning.error.value, unitizing.error.value, avoiding.math.value, j, k])        
          }  
          for(k in 15:18){
            eta[whole.numbers.value, partitioning.error.value, unitizing.error.value, avoiding.math.value, j, k] <- lambda.0[j,k] + lambda[j,k,1]*(whole.numbers.value - 1) + lambda[j,k,2]*(partitioning.error.value - 1) + lambda[j,k,3]*(unitizing.error.value - 1) + lambda[j,k,4]*(avoiding.math.value - 1) 
            exp.eta[whole.numbers.value, partitioning.error.value, unitizing.error.value, avoiding.math.value, j, k] <- exp(eta[whole.numbers.value, partitioning.error.value, unitizing.error.value, avoiding.math.value, j, k])        
          }  

          exp.eta[whole.numbers.value, partitioning.error.value, unitizing.error.value, avoiding.math.value, j, 2] <- 0
          exp.eta[whole.numbers.value, partitioning.error.value, unitizing.error.value, avoiding.math.value, j, 5] <- 0
          exp.eta[whole.numbers.value, partitioning.error.value, unitizing.error.value, avoiding.math.value, j, 9] <- 0
          exp.eta[whole.numbers.value, partitioning.error.value, unitizing.error.value, avoiding.math.value, j, 10] <- 0
          exp.eta[whole.numbers.value, partitioning.error.value, unitizing.error.value, avoiding.math.value, j, 14] <- 0
          

          exp.eta[whole.numbers.value, partitioning.error.value, unitizing.error.value, avoiding.math.value, j, 6] <- 0
          exp.eta[whole.numbers.value, partitioning.error.value, unitizing.error.value, avoiding.math.value, j, 7] <- 0
          exp.eta[whole.numbers.value, partitioning.error.value, unitizing.error.value, avoiding.math.value, j, 8] <- 0

          for(k in 1:K){
            pi[whole.numbers.value, partitioning.error.value, unitizing.error.value, avoiding.math.value, j, k] <- exp.eta[whole.numbers.value, partitioning.error.value, unitizing.error.value, avoiding.math.value, j, k]/sum(exp.eta[whole.numbers.value, partitioning.error.value, unitizing.error.value, avoiding.math.value, j, 1:K])
          } # closes loop over k
        } # closes loop over j

      } # closes loop over avoiding.math.value
    } # closes loop over unitizing.error.value
  } # closes loop over partitioning.error.value
} # closes loop over whole.numbers.value


###########################################################################################
# Specify the prior distributions for the parameters governing the CPT
###########################################################################################

for(j in 1:1){
  for(k in 1:1){
    lambda.0[j,k] ~ dnorm(0, .1)        # Location Parameter
    lambda[j,k,1] ~ dnorm(2, .1) I(0, ) # Effect of Appropriate Denominator
    for(m in 2:4){
      lambda[j,k,m] <- 0                # Effect of other LVs
    } # closes loop over m
  }

  for(k in 3:3){
    lambda.0[j,k] ~ dnorm(0, .1)        # Location Parameter
    lambda[j,k,1] ~ dnorm(2, .1) I(0, lambda[j,1,1]) # Effect of Appropriate Denominator
    for(m in 2:4){
      lambda[j,k,m] <- 0                # Effect of other LVs
    } # closes loop over m
  }

  for(k in 13:13){
    lambda.0[j,k] ~ dnorm(0, .1)        # Location Parameter
    lambda[j,k,1] <- 0                  # Effect of Appropriate Denominator
    lambda[j,k,2] <- 0
    lambda[j,k,3] ~ dnorm(2, .1) I(0, ) # Effect of iterating error
    for(m in 4:4){
      lambda[j,k,m] <- 0                # Effect of other LVs
    } # closes loop over m
  }

  for(k in 15:15){
    lambda.0[j,k] ~ dnorm(0, .1)        # Location Parameter
    lambda[j,k,1] <- 0                  # Effect of Appropriate Denominator
    lambda[j,k,2] ~ dnorm(2, .1) I(0, )
    lambda[j,k,3] ~ dnorm(2, .1) I(0, ) # Effect of iterating error
    for(m in 4:4){
      lambda[j,k,m] <- 0                # Effect of other LVs
    } # closes loop over m
  }

  for(k in 17:17){
    lambda.0[j,k] ~ dnorm(0, .1)        # Location Parameter
    for(m in 1:3){
      lambda[j,k,m] <- 0                # Effect of other LVs
    } # closes loop over m
    for(m in 4:4){
      lambda[j,k,m] ~ dnorm(2, .1) I(0, ) # Effect of avoiding math
    }
  }

  for(k in 18:18){
    lambda.0[j,k] <- 0        # Location Parameter
    for(m in 1:4){
      lambda[j,k,m] <- 0                # Effect of other LVs
    } # closes loop over m
  }

} # closes loop over j


###########################################################################################
# Specify the prior distributions for the parameters governing the CPT
###########################################################################################

for(j in 2:2){
  for(k in 1:1){
    lambda.0[j,k] ~ dnorm(0, .1)
  }
  for(k in 3:4){
    lambda.0[j,k] ~ dnorm(0, .1)
  }
  for(k in 11:13){
    lambda.0[j,k] ~ dnorm(0, .1)
  }
  for(k in 15:16){
    lambda.0[j,k] ~ dnorm(0, .1)
  }
  for(k in 18:18){
    lambda.0[j,k] <- 0
  }
  
  ######################
  # Effect of whole numbers
  ######################
  lambda[j,1,1] ~ dnorm(2, .1) I(0, )
  lambda[j,3,1] ~ dnorm(2, .1) I(0, lambda[j,1,1])
  lambda[j,4,1] ~ dnorm(2, .1) I(0, lambda[j,1,1])
  lambda[j,11,1] <- 0
  lambda[j,12,1] <- 0
  lambda[j,13,1] <- 0
  lambda[j,15,1] <- 0
  lambda[j,16,1] <- 0
  lambda[j,18,1] <- 0
  
  ######################
  # Effect of partitioning error
  ######################
  lambda[j,1,2] <- 0
  lambda[j,3,2] <- 0
  lambda[j,4,2] <- 0
  lambda[j,11,2] ~ dnorm(2, .1) I(0, )
  lambda[j,12,2] ~ dnorm(2, .1) I(0, )
  lambda[j,13,2] <- 0
  lambda[j,14,2] <- 0
  lambda[j,15,2] ~ dnorm(2, .1) I(0, )
  lambda[j,16,2] ~ dnorm(2, .1) I(0, )
  lambda[j,18,2] <- 0

  ######################
  # Effect of unitizing error
  ######################
  lambda[j,1,3] <- 0
  lambda[j,3,3] <- 0
  lambda[j,4,3] <- 0
  lambda[j,11,3] <- 0
  lambda[j,12,3] <- 0
  lambda[j,13,3] ~ dnorm(2, .1) I(0, )
  lambda[j,15,3] ~ dnorm(2, .1) I(0, )
  lambda[j,16,3] ~ dnorm(2, .1) I(0, )
  lambda[j,18,3] <- 0

} # closes loop over j


###########################################################################################
# Specify the prior distributions for the parameters governing the CPT
###########################################################################################


for(j in 3:3){
  for(k in 1:1){
    lambda.0[j,k] ~ dnorm(0, .1)
  }
  for(k in 3:4){
    lambda.0[j,k] ~ dnorm(0, .1)
  }
  for(k in 11:13){
    lambda.0[j,k] ~ dnorm(0, .1)
  }
  for(k in 15:17){
    lambda.0[j,k] ~ dnorm(0, .1)
  }
  for(k in 18:18){
    lambda.0[j,k] <- 0
  }
  
  ######################
  # Effect of whole numbers
  ######################
  lambda[j,1,1] ~ dnorm(2, .1) I(0, )
  lambda[j,3,1] ~ dnorm(2, .1) I(0, lambda[j,1,1])
  lambda[j,4,1] ~ dnorm(2, .1) I(0, lambda[j,1,1])
  lambda[j,11,1] <- 0
  lambda[j,12,1] <- 0
  lambda[j,13,1] <- 0
  lambda[j,15,1] <- 0
  lambda[j,16,1] <- 0
  lambda[j,17,1] <- 0
  lambda[j,18,1] <- 0
  
  ######################
  # Effect of partitioning error
  ######################
  lambda[j,1,2] <- 0
  lambda[j,3,2] <- 0
  lambda[j,4,2] <- 0
  lambda[j,11,2] ~ dnorm(2, .1) I(0, )
  lambda[j,12,2] ~ dnorm(2, .1) I(0, )
  lambda[j,13,2] <- 0
  lambda[j,14,2] <- 0
  lambda[j,15,2] ~ dnorm(2, .1) I(0, )
  lambda[j,16,2] ~ dnorm(2, .1) I(0, )
  lambda[j,17,2] <- 0
  lambda[j,18,2] <- 0

  ######################
  # Effect of unitizing error
  ######################
  lambda[j,1,3] <- 0
  lambda[j,3,3] <- 0
  lambda[j,4,3] <- 0
  lambda[j,11,3] <- 0
  lambda[j,12,3] <- 0
  lambda[j,13,3] ~ dnorm(2, .1) I(0, )
  lambda[j,15,3] ~ dnorm(2, .1) I(0, )
  lambda[j,16,3] ~ dnorm(2, .1) I(0, )
  lambda[j,17,3] <- 0
  lambda[j,18,3] <- 0

  ######################
  # Effect of avoiding.math
  ######################
  lambda[j,1,4] <- 0
  lambda[j,3,4] <- 0
  lambda[j,4,4] <- 0
  lambda[j,11,4] <- 0
  lambda[j,12,4] <- 0
  lambda[j,13,4] <- 0
  lambda[j,15,4] <- 0
  lambda[j,16,4] <- 0
  lambda[j,17,4] ~ dnorm(2, .1) I(0, )
  lambda[j,18,4] <- 0

} # closes loop over j


} # closes the model
